# Supplementary material
Source: PubMed Central journal article supplement (PMC3427743)
Supplement: NIHMS389556-supplement-1_si_001.pdf [file NIHMS389556-supplement-1_si_001.pdf]

## Supplemental Information

### Gold Nanoparticles for Neural Prosthetics Devices

Huanan Zhang<sup>1</sup>, Jimmy Shih<sup>1</sup>, Jian Zhu<sup>1</sup>, Nicholas A. Kotov<sup>1\*</sup>

<sup>1</sup>Department of Chemical Engineering, University of Michigan, Ann Arbor, Michigan, 48109

\*To whom correspondence should be addressed. E-mail: kotov@umich.edu

AFM comparison of Au NP and CNT LBL films.

|                | Au NP film           | CNT film             |
|----------------|----------------------|----------------------|
| Mean Roughness | 7.386nm              | 10.376nm             |
| Surface Area   | 9.474um <sup>2</sup> | 9.467um <sup>2</sup> |

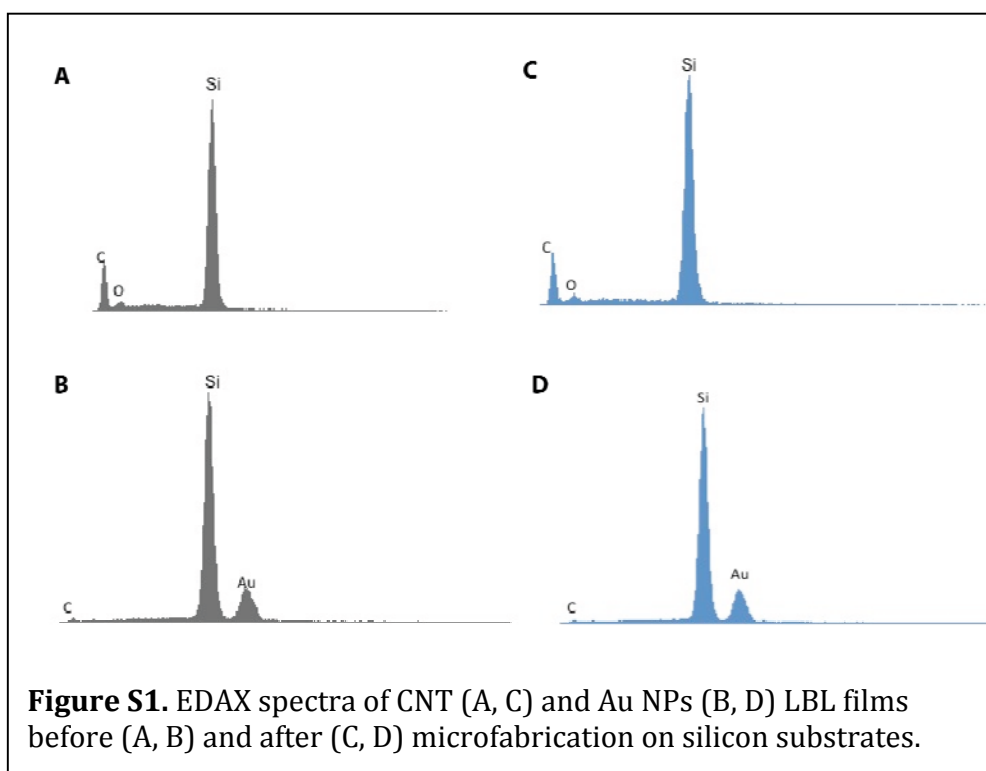

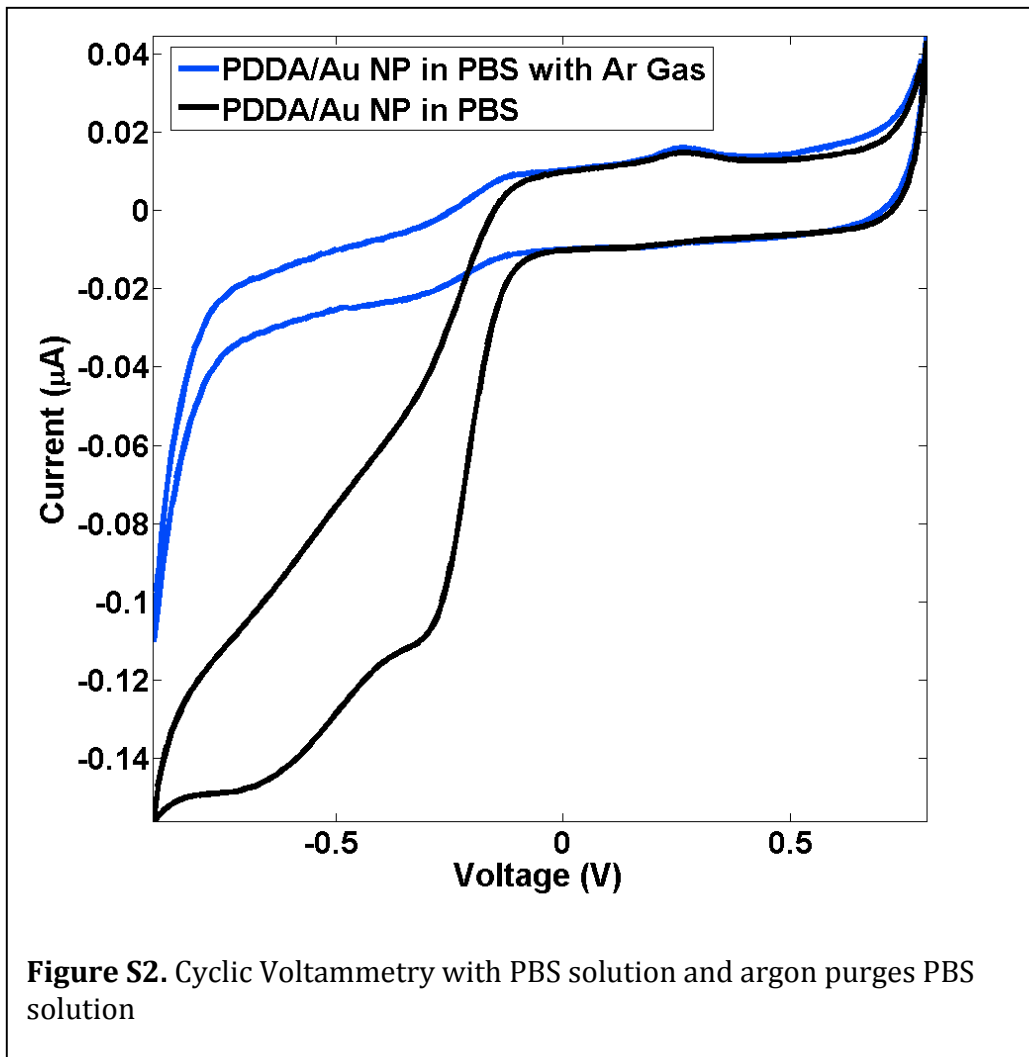

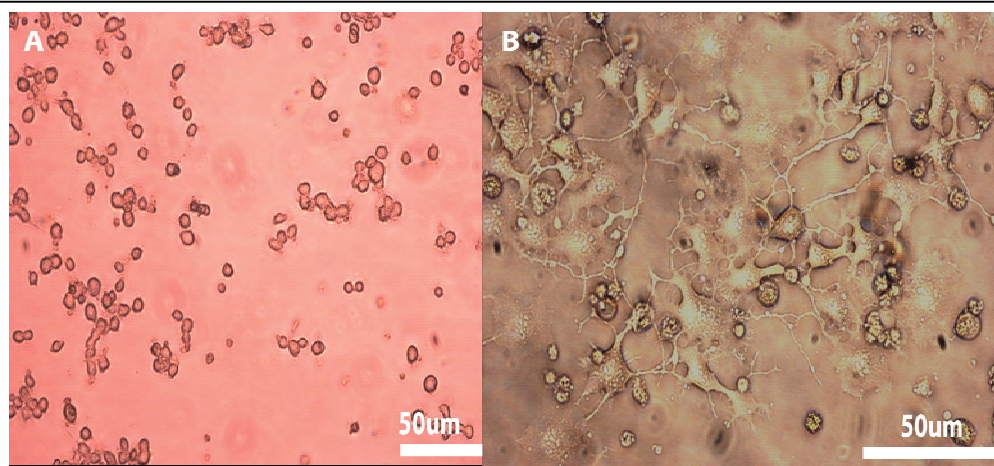

**Figure S3.** Optical Images of (A) pre-differentiated NG-108 cells (B) differentiated NG-108 cells on Au NP/PDDA film

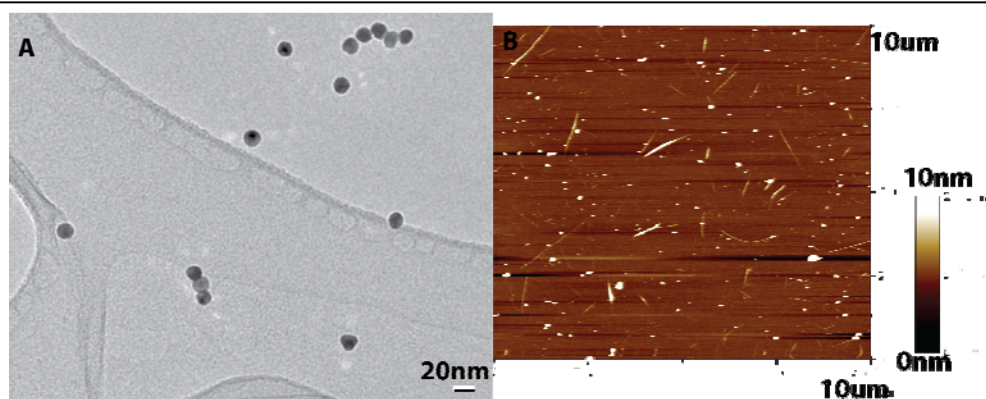

**Figure S4.** (A)TEM image of as synthesized Au NP (B) AFM image of dispersed CNT.

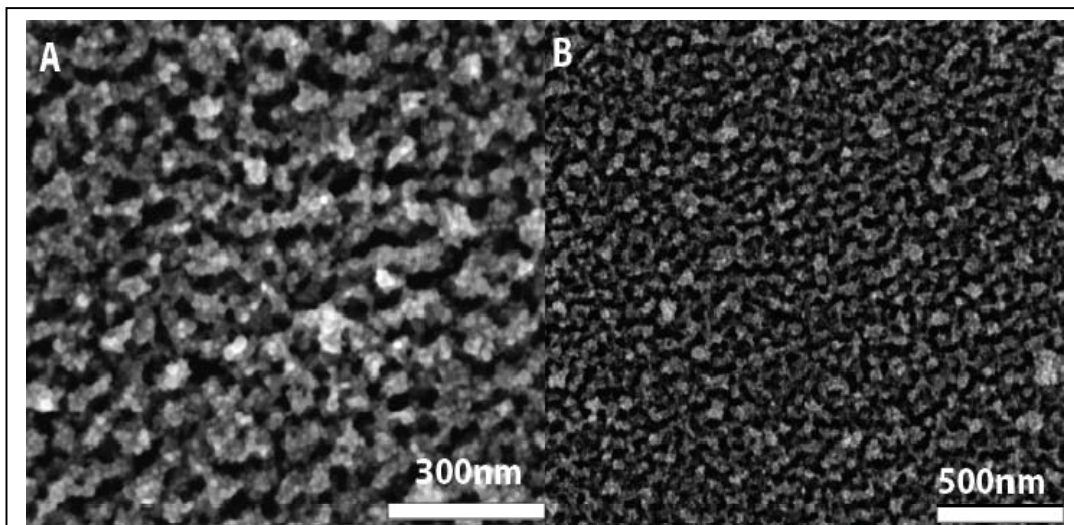

**Figure S5.** High resolution SEM image of Au NP film.

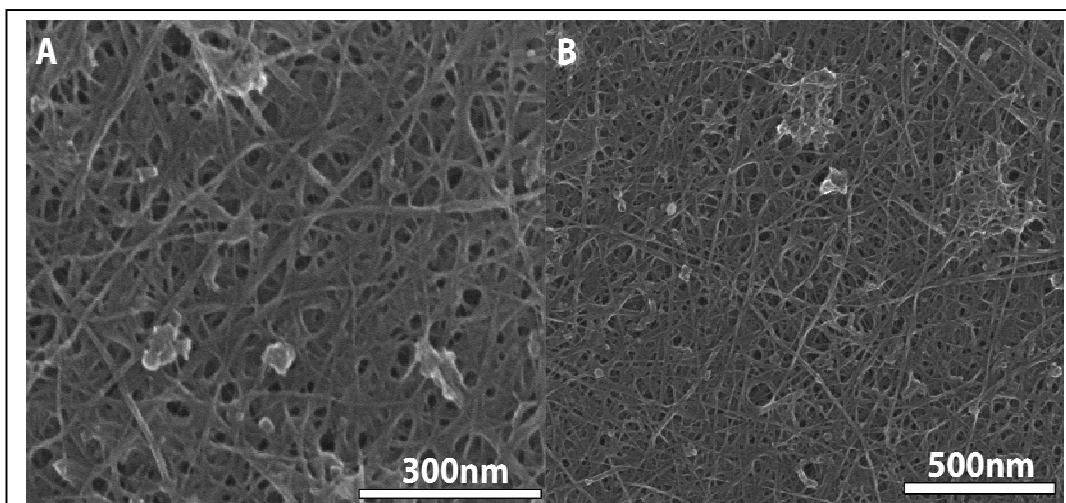

**Figure S6.** High resolution SEM image of CNT film.
